# Supplementary material for: The MATES Case Management Model: Presenting Problems and Referral Pathways for a Novel Peer-Led Approach to Addressing Suicide in the Construction Industry
Source: MDPI journal article supplement (doi:10.3390/ijerph18136740), 2021-06-23
Supplement: s1 [file s1]

**Supplementary table 1. Six-item exit survey administered to MATES clients.**

| Question                                                                                               | Response             |     |       |    |               |
|--------------------------------------------------------------------------------------------------------|----------------------|-----|-------|----|---------------|
|                                                                                                        | Absolutely Yes       | Yes | Maybe | No | Absolutely No |
| 1) Do you feel the nature of your concerns were met during the case management process?                |                      |     |       |    |               |
| 2) Were the services appropriate in meeting your needs                                                 |                      |     |       |    |               |
| 3) Did you feel actively involved in the decision-making process?                                      |                      |     |       |    |               |
| 4) Do you consider that your medical, emotional, mental well-being and spiritual needs were addressed? |                      |     |       |    |               |
| 5) Would you recommend MATES to co-workers, family and friends?                                        |                      |     |       |    |               |
| 6) Any comments about MATES or case management you would like to make:                                 | Open answer response |     |       |    |               |
